# Supplementary material for: To Bind or to Let Loose: Effectiveness of Sodium Polystyrene Sulfonate in Decreasing Serum Potassium
Source: Hindawi journal article supplement (doi:10.1155/2012/940320), 2012-01-01
Supplement: f1 [file 940320.f1.pdf]

# Supplemental Table I: Summary of case reports of SPS associated intestinal injury [1-19]

| Paper                | Age/sex | Patient description                                         | Complication                                                     | Intervention/outcome                             |
|----------------------|---------|-------------------------------------------------------------|------------------------------------------------------------------|--------------------------------------------------|
| Lillemoe (1987)      | 15?     | Transplant nephrectomy, AV shunt repair                     | Colonic necrosis, sepsis, necrotising fasciitis                  | Colectomy/death                                  |
|                      | 40f     | Nephrectomy, appendectomy                                   | Transmural infarction of colon                                   | Right hemicolectomy                              |
|                      | 52m     | Coronary artery bypass graft                                | Mucosal and transmural infarction of the colon and cecum         | Total abdominal colectomy/death                  |
|                      | 34m     | Transplant nephrectomy                                      | Necrosis of the right and transverse colon and terminal ileum    | Hemicolectomy, ileal resection/death             |
|                      | 31m     | aortic valve replacement, multiorgan failure                | Colonic necrosis and perforation                                 | ?/Death due to cardiac arrest                    |
| Wooton (1989)        | 48m     | Renal transplant                                            | Necrotic transverse colon                                        | Colectomy                                        |
| Gerstmann (1992)     | 43m     | Transplant nephrectomy                                      | Necrotic cecum and 2 frank perforations                          | Right colectomy                                  |
|                      | 42m     | Cardiac transplantation/renal failure                       | Inflamed, edematous small bowel and right colon                  | Cecostomy tube placement                         |
| Scott (1993)         | 48m     | Renal transplant                                            | Within hours colonic necrosis                                    | Colectomy                                        |
| Roy-chaudhary (1997) | 42f     | Surgical revision of left acetabular graft                  | Gastric and ileocecal toxicity/serpiginous ulcers                | Surgery                                          |
| Gardiner (1997)      | 66m     | Aortic valve replacment,cardiac arrest, multiorgan failure  | Acute transmural inflammation                                    | ?/death                                          |
|                      | 71f     | Chronic lower GI bleed, uremia                              | Acute transmural inflammation and focal hemorrhage               | Right hemicolectomy/death                        |
| Dardik (2000)        | 61m     | Clostridium difficile colitis                               | Ischemic colitis                                                 | Transverse colectomy                             |
| Rogers (2001)        | 55m     | Compartment syndrome with fasciotomies, multiorgan failure  | Colonic necrosis                                                 | Colectomy                                        |
| Cheng (2002)         | 53f     | 25% total body surface area burns, grafting surgery         | Colonic necrosis/perforation, sepsis, multiorgan failure         | Colectomy/Death                                  |
| Kelsey (2003)        | 79m     | Occlusion of vascular access with arteriogram, opioid use   | Ischemic necrosis, perforation of the colon                      | Right ileocelectomy                              |
| Chatelain (2007)     | 46m     | Motor vehical accident requiring thoracotomy and laporotomy | Ischemic colitis, sigmoid and rectal stricture                   | Hartmann's procedure, resection of the stricture |
| Shioya (2007)        | 77f     | Diabetic ketoacidosis, duodenal ulcer hemorrhage            | Colonic ulcer and stenosis, 1 year later sigmoidovesical fistula | 1 year later sigmoidectomy                       |
| Pusztaszeri (2007)   | 87m     | Occlusion of vascular access                                | Jejunal diverticulitis                                           | Resection of jejunum                             |
| Bomback (2009)       | 56f     | Gastritis, given opioid, colon polyp                        | Colonic injury                                                   | Bi-directional endoscopy                         |
| Thomas (2009)        | 64f     | Multiorgan failure, lower limb ischemia                     | Colonic necrosis                                                 | Colonoscopy                                      |
| Joo (2009)           | 34m     | Intracerebral hemorrhage with Burr hole                     | Acute colitis, hematochezia                                      | 2 sigmoidoscopies/death                          |
| Trottier (2009)      | 24f     | Barbituric coma, ileus                                      | Transmural colon necrosis, abdominal compartment syndrome        | Right hemicolectomy, resection of ileum          |
| Chou (2011)          | 30m     | Lower gastrointestinal bleed                                | Colonic necrosis                                                 | Colonoscopy                                      |

This table summarizes all the case reports, except the paper by Rashid et al. as he has already summarized the clinical cases in table 1 of his paper <sup>19</sup>.
